# Supplementary material for: Combining proteogenomics and metaproteomics for deep taxonomic and functional characterization of microbiomes from a non-sequenced host
Source: PubMed Central journal article supplement (PMC7275042; doi:10.1038/s41522-020-0133-2), 2020-06-05
Supplement: 41522_2020_133_MOESM1_ESM.pdf [file 41522_2020_133_MOESM1_ESM.pdf]

## **Supplementary Information**

### **Combining proteogenomics and metaproteomics for deep taxonomic and functional characterization of microbiomes from non-sequenced hosts**

Duarte Gouveia<sup>1</sup>, Olivier Pible<sup>1</sup>, Karen Culotta<sup>1</sup>, Virginie Jouffret<sup>1</sup>, Olivier Geffard<sup>2</sup>, Arnaud Chaumot<sup>2</sup>, Davide Degli-Esposti<sup>2</sup>, Jean Armengaud<sup>1\*</sup>

<sup>1</sup> Laboratoire Innovations technologiques pour la Détection et le Diagnostic (Li2D), Service de Pharmacologie et Immunoanalyse (SPI), CEA, INRA, F-30207 Bagnols-sur-Cèze, France.

<sup>2</sup> Irstea, UR Riverly Laboratoire d'écotoxicologie, centre de Lyon-Villeurbanne, F-69625 Villeurbanne, France.

#### **\* Corresponding author**

Jean Armengaud, CEA-Marcoule, DRF-Li2D, Laboratory “Innovative technologies for Detection and Diagnostics”, BP 17171, F-30200 Bagnols-sur-Cèze, France;

[jean.armengaud@cea.fr](mailto:jean.armengaud@cea.fr); Tel: +00 33 4 66 79 68 02; Fax: +00 33 4 66 79 19 05.

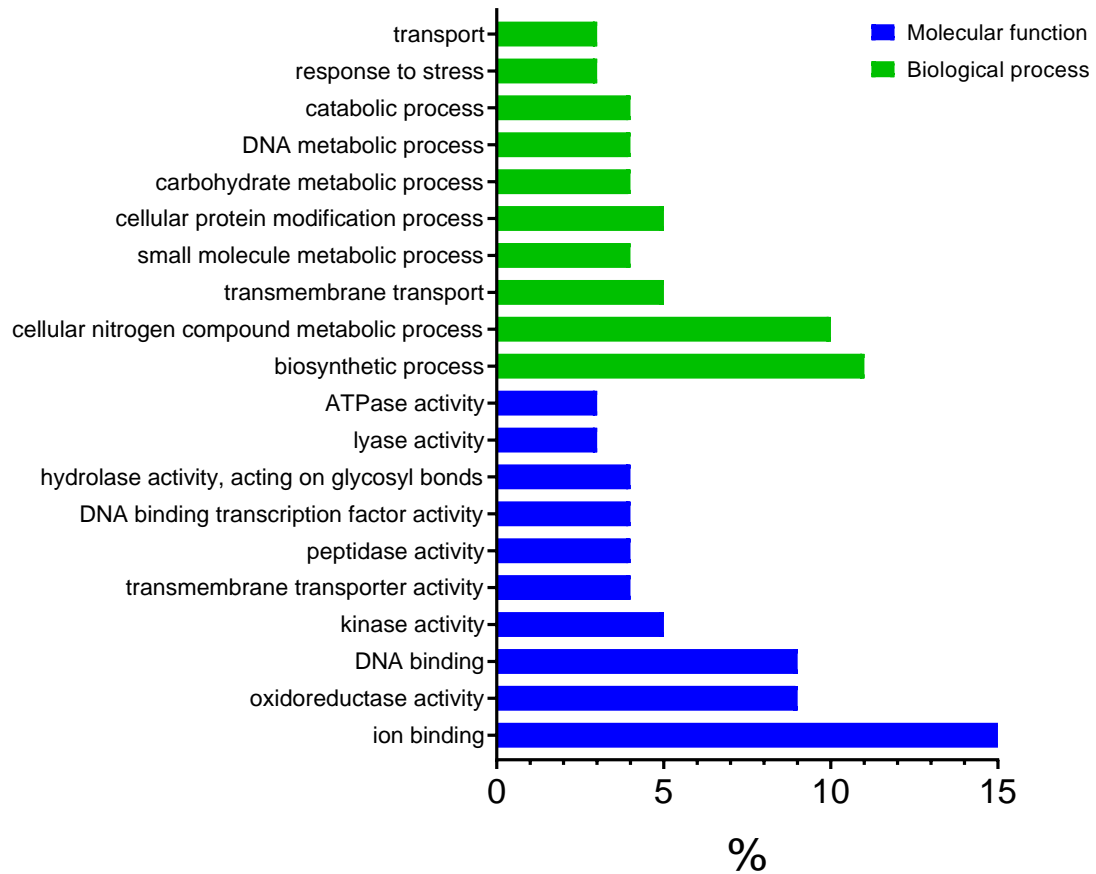

**Supplementary Figure 1** - The ten most abundant GOslim terms for the categories “Molecular Function” and “Biological Process”, obtained through annotation of proteins from the microbiota.

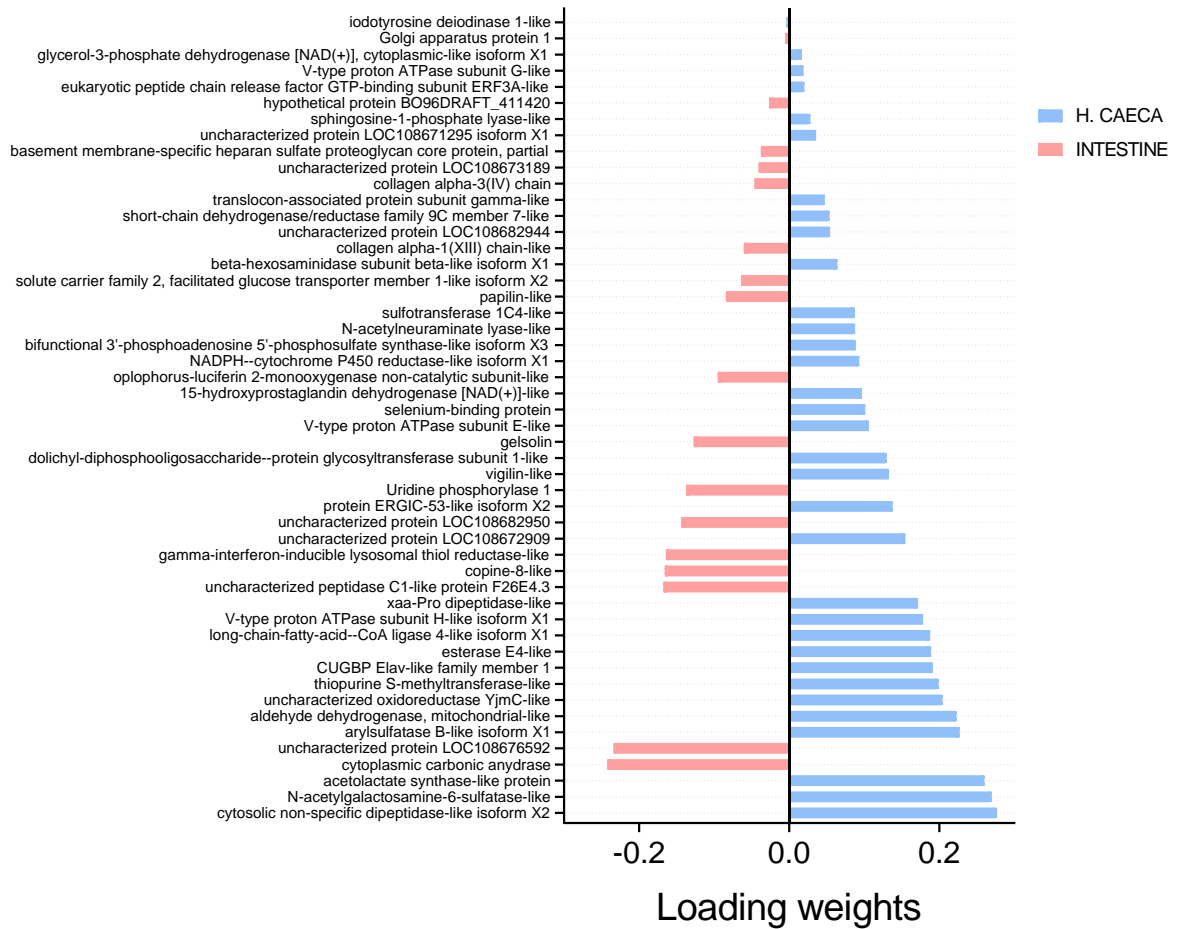

**Supplementary Figure 2** - Loadings from the sPLS-DA analysis comprising the fifty host protein groups that best discriminate HC from INT.

## **Captions for the Supplementary Data Sets**

**Supplementary Data 1: Taxa selected in step 1 for the construction of the sub-databases.**

**Supplementary Data 2: Results of database searches for each step of the pipeline.**

**Supplementary Data 3: List of identified genus and their relative abundances based on the number of total and specific TSMs, and number of specific peptides.**

**Supplementary Data 4: List of protein groups identified in Step 3.**

**Supplementary Data 5: List of GOslim annotations and their relative abundances.**

**Supplementary Data 6: List of genus associated with biosynthetic process and cellular nitrogen compound metabolic process**

**Supplementary Data 7: Univariate non-parametric statistics performed on the discriminant features from sPLS-DA.**
